# Supplementary material
Source: PubMed Central journal article supplement (PMC3538865)
Supplement: NIHMS284314-supplement-Supp_1.pdf [file NIHMS284314-supplement-Supp_1.pdf]

| <b>Feature</b>                       | <b>Minimum Value</b> | <b>Boundary 1</b> | <b>Boundary 2</b> | <b>Boundary 3</b> | <b>Maximum Value</b> |
|--------------------------------------|----------------------|-------------------|-------------------|-------------------|----------------------|
| ln(HHSearch e-value)                 | -100                 | -92.1             | -62.44            | -20.99            | -0.01                |
| Average BLOSUM Score                 | -4                   | -1.5              | -0.5              | 1.5               | 11.0                 |
| Average Burial in Template Structure | 2.0                  | 9.5               | 11.0              | 12.5              | 20.5                 |
| Average Distance to Alignment Gap    | 1                    | 8.5               | 14.0              | 22.0              | 180.0                |

**Supporting Table S1: Summary statistics for feature variables.** Each aligned residue pair was annotated with the four statistics listed above using the approach outlined in *Methods*. In order to calculate the single-feature deviation estimates shown in **Figure 1**, each variable was divided into four quantiles of equal size using the boundaries listed above.
