# Supplementary material
Source: PubMed Central journal article supplement (PMC3538865)
Supplement: NIHMS284314-supplement-Supp_2.pdf [file NIHMS284314-supplement-Supp_2.pdf]

### **Supporting Text S1: Command-line flags used for Rosetta comparative modeling.**

As described in the main text, we tested four comparative modeling protocols.

Command-line flags for each protocol are listed below. Variables that are meant to be supplied by the user are listed in the format `{$variable_name}`, and the definition of each variable is shown in **Supporting Table S2**.

#### *Rebuild and Refine*

-run:protocol threading

-run:shuffle

-database minirosetta\_database

-in:file:alignment {\$alignment\_fn}

-cm:aln\_format grishin

-frag3 {\$frag3\_fn}

-frag9 {\$frag9\_fn}

-loops:frag\_sizes 9 3 1

-loops:frag\_files {\$frag9\_fn} {\$frag3\_fn} none

-in:file:fasta {\$fasta\_fn}

-in:file:fullatom

-in:file:psipred\_ss2 {\$psipred\_fn}

-in:file:fullatom

-idealize\_after\_loop\_close

-out:file:silent\_struct\_type binary

-loops:extended

-loops:build\_initial

-loops:remodel quick\_ccd

-loops:relax fastrelax  
-relax:fastrelax\_repeats 16  
-silent\_decoytime

-random\_grow\_loops\_by 4  
-select\_best\_loop\_from 1

-in:detect\_disulf false  
-fail\_on\_bad\_hbond false

-bGDT  
-evaluation:gdtmm  
-in:file:template\_pdb {\${template\_pdb\_fn\_str}}

#### *Restrained Rebuild and Refine*

Use the same flags as Rebuild and Refine and add the following:

-constraints:cst\_file {\${cst\_file}}  
-constraints:cst\_weight 0.1

#### *Rebuild and Restrained Refine*

Use the same flags as Rebuild and Refine and add the following:

-constraints:cst\_fa\_file {\${cst\_file}}  
-constraints:cst\_fa\_weight 0.1

#### *Restrained Rebuild and Restrained Refine*

Use the same flags as Rebuild and Refine and add the following:

-constraints:cst\_file {\${cst\_file}}  
-constraints:cst\_weight 0.1  
  
-constraints:cst\_fa\_file {\${cst\_file}}

-constraints:cst\_fa\_weight 0.1
