# Supplementary material
Source: PubMed Central journal article supplement (PMC3538865)
Supplement: NIHMS284314-supplement-Supp_3.pdf [file NIHMS284314-supplement-Supp_3.pdf]

| <b>Variable Name</b>                        | <b>Description</b>                                               |
|---------------------------------------------|------------------------------------------------------------------|
| { <i>\$alignment_fn</i> }                   | Alignment file listing a series of query/template alignments.    |
| { <i>\$frag3_fn</i> },{ <i>\$frag9_fn</i> } | Standard Rosetta fragment files.                                 |
| { <i>\$psipred_fn</i> }                     | PSIPRED SS2 formatted secondary structure prediction file.       |
| { <i>\$template_pdb_fn_str</i> }            | List of template PDB files used for constructing partial models. |
| { <i>\$cst_file</i> }                       | File containing Gaussian restraints for query sequence.          |

**Supporting Table S2: Input variables for Rosetta rebuild and refine protocol.** As described in *Methods* and *Results*, we tested the spatial restraints using four protocols that used the restraints. Command-line flags for each protocol are listed in **Supporting Text S1**.

Input files that are meant to be supplied by the user are denoted as {*\$variable\_name*}. Examples of the file formats are available upon request and will be provided in the next release of Rosetta (v3.3).
