# Supplementary material
Source: PubMed Central journal article supplement (PMC3538865)
Supplement: NIHMS284314-supplement-Supp_4.pdf [file NIHMS284314-supplement-Supp_4.pdf]

**Supporting Text S4: Model-quality statistics.** A common method for assessing the quality of a protein structure relative to a reference is GDT[13]. Briefly, this algorithm measures the average number of residues superimposable under a variety of distance thresholds. We use an approach that differs slightly from the canonical GDT implementation, in that superposition is done using Mammoth [14] rather than the Maxsub [15]. Mammoth begins superimposition between the two sets of coordinates using 7-mer seeds. The seeds are extended so long as the average RMSD across the aligned coordinates does not exceed a user-specified threshold. Once the alignment extension is finished, one set of coordinates is superimposed onto the other and the function reports the percentage of aligned atoms that superimpose beneath a user-defined threshold. It is important to note that GDTMM is a sequence-dependent algorithm, which means that the *i*th coordinate in the first list is always superimposed onto the *i*th coordinate of the second.

The GDTMM function is thus given the two sets of coordinates, a distance threshold used for extending alignments, and a second distance threshold under which two aligned coordinates are considered equivalent. The final value of GDTMM is the average computed across the following sets of distance thresholds:

| Function Call Name | Alignment Threshold | Equivalence Threshold |
|--------------------|---------------------|-----------------------|
| gdtmm1_1           | 1Å                  | 1Å                    |
| gdtmm2_2           | 2Å                  | 2Å                    |
| gdtmm3_3           | 3Å                  | 3Å                    |
| gdtmm4_3           | 4Å                  | 3Å                    |
| gdtmm7_4           | 7Å                  | 4Å                    |

A routine for calculating GDTMM is provided as part of the standard Rosetta software suite of programs, and can be activated using following command-line flags:

-bGDT

-evaluation:gdtmm

-in:file:native native.pdb
