# Supplementary material
Source: PubMed Central journal article supplement (PMC3538865)
Supplement: NIHMS284314-supplement-Supp_5.pdf [file NIHMS284314-supplement-Supp_5.pdf]

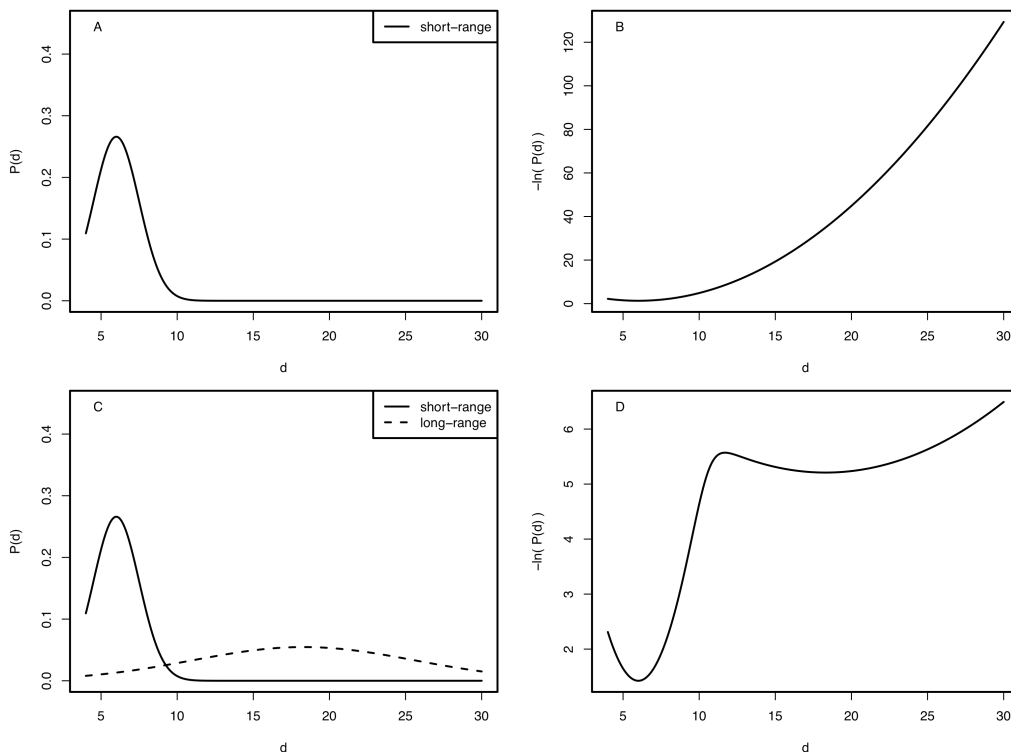

**Supporting Figure S1: Schematic view of the two-component Gaussian mixture model.** In order to describe the Gaussian mixture approach outlined in *Methods*, the behavior of a simple model system is shown. Panel A shows the Gaussian probability density function given a template distance of  $6.0\text{\AA}$  and a standard deviation of  $1.5\text{\AA}$ . Panel B shows the score of that restraint as incorporated into Rosetta, which is simply the negative logarithm of that probability distribution. Panel C shows the same short-range Gaussian alongside a Gaussian with mean of  $18.3\text{\AA}$  and standard deviation of  $7.3\text{\AA}$ , which are the values expected given sequence separation of 12 residues. In Panel C the short-range and long-range probability distribution functions are multiplied by 0.9 and 0.1 respectively, so that the mixture of these two distributions integrates to 1.0. Panel D shows the negative log-probability of the Gaussian mixture model, which is similar at the minimum of the potential but avoids the quadratic penalty associated with high distance deviations from the template structures.
